# Supplementary material for: Identification of the phytobioactive Polygonum cuspidatum as an antiviral source for restricting dengue virus entry
Source: PubMed Central journal article supplement (PMC7532532; doi:10.1038/s41598-020-71849-3), 2020-10-02
Supplement: 41598_2020_71849_MOESM1_ESM.pdf [file 41598_2020_71849_MOESM1_ESM.pdf]

# Identification of the Phytoactive *Polygonum cuspidatum* as an Antiviral Source for Restricting Dengue Virus Entry

Yu-Ting Kuo<sup>a,1</sup>, Ching-Hsuan Liu<sup>b,c,1</sup>, Jin-Wei Li<sup>d</sup>, Chien-Ju Lin<sup>e</sup>, Alagie Jassey<sup>f</sup>, Huey-Nan Wu<sup>g</sup>, Guey Chuen Perng<sup>h,i</sup>, Ming-Hong Yen<sup>d,e</sup> and Liang-Tzung Lin<sup>b,j,\*</sup>

- <sup>a</sup> Department of Medical Imaging, Chi Mei Medical Center, Tainan, Taiwan
- <sup>b</sup> Graduate Institute of Medical Sciences, College of Medicine, Taipei Medical University, Taipei, Taiwan
- <sup>c</sup> Department of Microbiology & Immunology, Dalhousie University, Halifax, Nova Scotia, Canada
- <sup>d</sup> Graduate Institute of Natural Products, College of Pharmacy, Kaohsiung Medical University, Kaohsiung, Taiwan
- <sup>e</sup> School of Pharmacy, College of Pharmacy, Kaohsiung Medical University, Kaohsiung, Taiwan
- <sup>f</sup> International Ph.D. Program in Medicine, College of Medicine, Taipei Medical University, Taipei, Taiwan
- <sup>g</sup> Institute of Molecular Biology, Academia Sinica, Taipei, Taiwan
- <sup>h</sup> Department of Microbiology and Immunology & Institute of Basic Medical Sciences, College of Medicine, National Cheng Kung University, Tainan, Taiwan
- <sup>i</sup> Center of Infectious Diseases and Signaling Research, National Cheng Kung University, Tainan, Taiwan
- <sup>j</sup> Department of Microbiology and Immunology, School of Medicine, College of Medicine, Taipei Medical University, Taipei, Taiwan

<sup>1</sup>These authors share first authorship.

## \*CORRESPONDENCE

Liang-Tzung Lin, Department of Microbiology and Immunology, School of Medicine, College of Medicine, Taipei Medical University, No. 250, Wu-Hsing Street, Taipei 11031, Taiwan, Tel: +886-2-2736-1661 ext. 3911, Fax: +886-2-2736-1661 ext. 3921, E-mail: [ltlin@tmu.edu.tw](mailto:ltlin@tmu.edu.tw).

## Supplementary Data

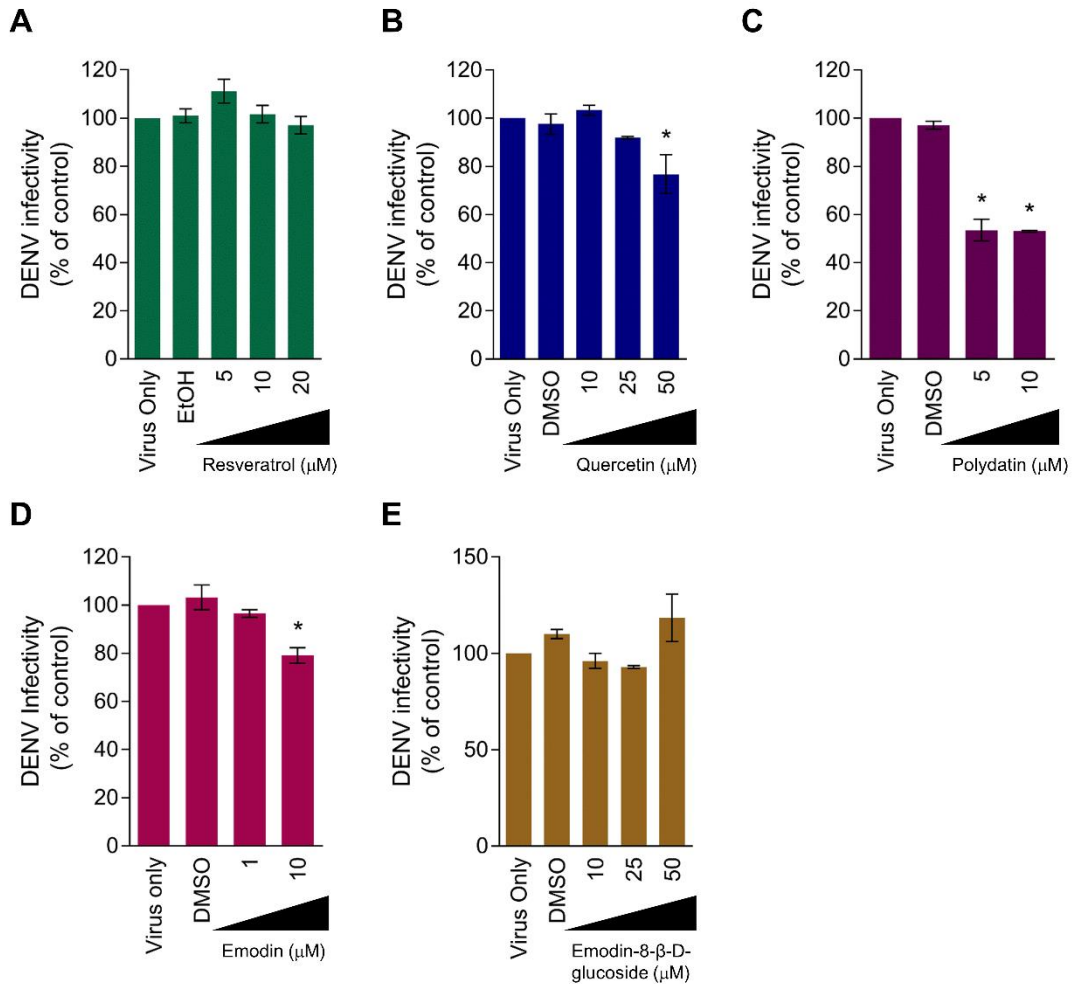

**Fig S1. Effect of major molecular components from PCME on DENV infectivity.** Vero cells ( $2 \times 10^5$  cells/well of 12-well plates) were infected with DENV-2 (100 PFU/well) in the presence of various concentrations of (A) Resveratrol, (B) Quercetin, (C) Emodin, (D) Polydatin, or (E) Emodin-8- $\beta$ -D-glucoside for 1.5 h at 37 °C, washed with PBS, and incubated for 6 days. The cells were then immunostained with DENV E protein for viral plaque quantitation as described in the Materials and Methods. Data are plotted against the DMSO negative control treatment and expressed as percent (%) DENV infectivity. Data shown are means  $\pm$  SEM (\* $p < 0.05$ ) from 2 independent experiments.

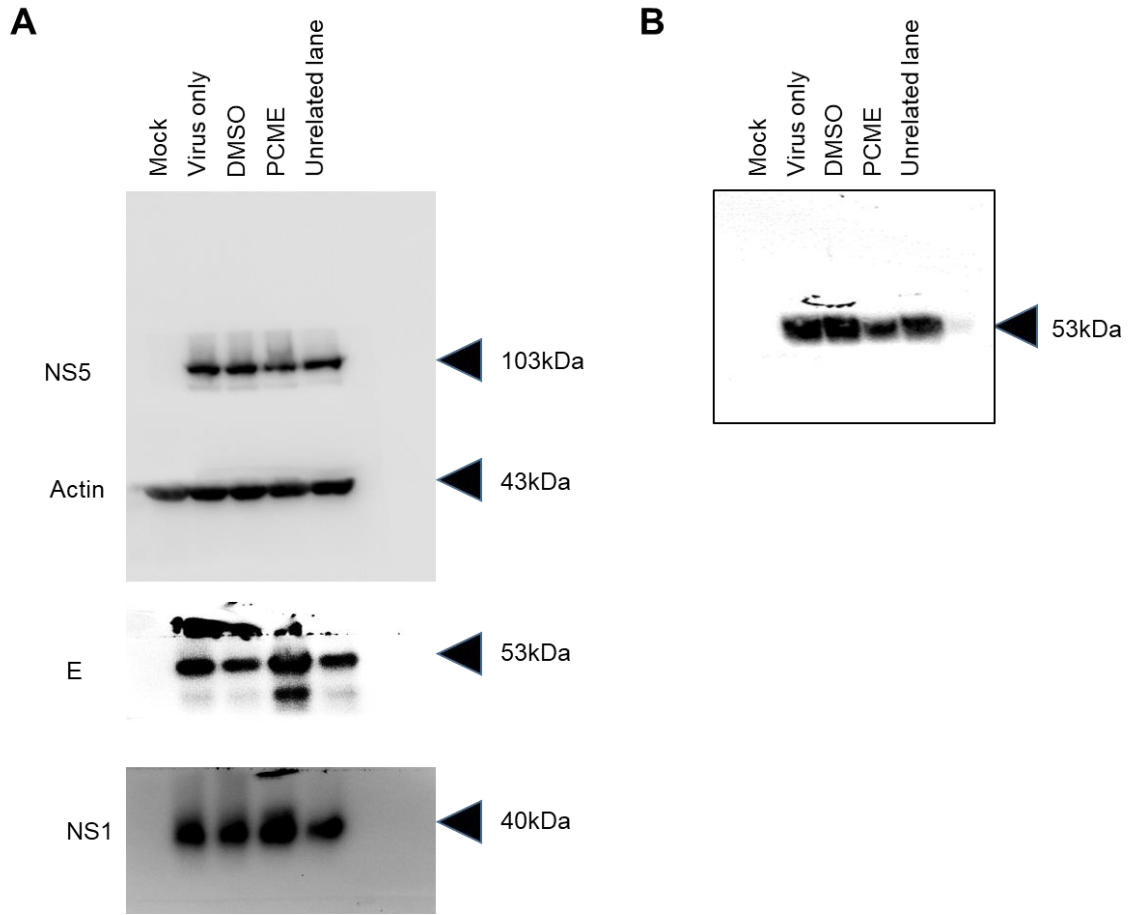

**Fig S2. Full-length Western blots for the figures. (A) Figure 6C, (B) Figure 6D.**
